# Supplementary material for: Clinical impact and network of determinants of tumour necrosis in colorectal cancer
Source: PubMed Central journal article supplement — Br J Cancer. 2016 May 19;114(12):1334–42. doi: 10.1038/bjc.2016.128 (PMC4984458; doi:10.1038/bjc.2016.128), 2016-05-19
Supplement: bjc2016128x1.pdf [file bjc2016128x1.pdf]

## Supplementary Online Material

### Supplementary tables

**Table S1.** Patient characteristics

|                                                | Study cohort (n=147) | Validation cohort (n = 418) |
|------------------------------------------------|----------------------|-----------------------------|
| Age, mean (SD)                                 | 66.9 (11.2)          | 67.7 (12.4)                 |
| Sex                                            |                      |                             |
| Male                                           | 79 (53.7%)           | 200 (47.8%)                 |
| Female                                         | 68 (46.3%)           | 218 (52.2%)                 |
| Preoperative radiotherapy or chemoradiotherapy |                      |                             |
| No                                             | 116 (78.9%)          | 418 (100%)                  |
| Yes                                            | 31 (21.1%)           | 0 (0%)                      |
| Tumor location                                 |                      |                             |
| Proximal colon                                 | 49 (33.3%)           | 130 (31.1%)                 |
| Distal colon                                   | 27 (18.4%)           | 116 (27.8%)                 |
| Rectum                                         | 71 (48.3%)           | 172 (41.1%)                 |
| WHO grade                                      |                      |                             |
| G1 (well)                                      | 20 (13.6%)           | 101 (24.2%)                 |
| G2 (moderately)                                | 108 (73.5%)          | 246 (58.9%)                 |
| G3 (poorly)                                    | 19 (12.9%)           | 71 (17.0%)                  |
| TNM Stage                                      |                      |                             |
| Stage I                                        | 26 (17.8%)           | 90 (21.5%)                  |
| Stage II                                       | 55 (37.7%)           | 180 (43.1%)                 |
| Stage III                                      | 46 (31.5%)           | 98 (23.4%)                  |
| Stage IV                                       | 19 (13.0%)           | 50 (12.0%)                  |
| Mismatch repair (MMR) screening status         |                      |                             |
| MMR Deficient                                  | 11 (7.5%)            | 36 (9.0%)                   |
| MMR Proficient                                 | 136 (92.5%)          | 362 (91.0%)                 |
| Serrated histology                             |                      |                             |
| No                                             | 114 (77.6%)          | 372 (89.0%)                 |
| Yes                                            | 34 (22.4%)           | 46 (11.0%)                  |
| Infiltrative growth pattern                    |                      |                             |
| No                                             | 105 (71.4%)          | 341 (81.6%)                 |
| Yes                                            | 42 (28.6%)           | 77 (18.4%)                  |
| Necrosis percentage, median (IQR)              | 10.0 (5.0-25.0)      | 8.0 (5.0-15.0)              |

**Table S2.** Antibodies and protocols used in immunohistochemistry

| Antigen                                             | Antigen retrieval | Antibody type     | Manufacturer  | Clone     | Code   | Dilution | Incubation | Antibody visualization |
|-----------------------------------------------------|-------------------|-------------------|---------------|-----------|--------|----------|------------|------------------------|
| MLH1                                                | Tris-EDTA pH9*    | mouse monoclonal  | BD-Pharmingen | G168-15   | 551091 | 1:200    | overnight  | NovoLink               |
| MSH2                                                | Tris-EDTA pH9*    | mouse monoclonal  | BD-Pharmingen | G219-1129 | 556349 | 1:150    | 1 hr       | EnVision               |
| Ki-67                                               | Tris-EDTA pH9*    | mouse monoclonal  | DAKO          | MIB-1     | M7240  | 1:300    | 30 min     | EnVision               |
| CD31                                                | Tris-EDTA pH9*    | mouse monoclonal  | DAKO          | JC70A     | M0823  | 1:300    | 45 min     | EnVision               |
| CD105                                               | Tris-EDTA pH9*    | mouse monoclonal  | DAKO          | SN6h      | M3527  | 1:50     | 1 hr       | EnVision               |
| von Willebrand factor (Factor VIII related antigen) | Tris-EDTA pH9*    | rabbit polyclonal | DAKO          | -         | A0082  | 1:5000   | 30 min     | EnVision               |

\*In a microwave oven at 800W for 2 min and at 150W for 15 min.

**Table S3.** Correlations between tumor necrosis and clinicopathological characteristics in the study cohort (n=147)

| Variable                    | Tumor necrosis percentage |         |
|-----------------------------|---------------------------|---------|
|                             | Median (IQR)              | P value |
| Age                         |                           |         |
| <65                         | 10.5 (5.0-30.0)           | 0.724   |
| ≥65                         | 9.0 (5.0-21.0)            |         |
| Sex                         |                           |         |
| Male                        | 10.0 (5.0-25.0)           | 0.847   |
| Female                      | 10.0 (5.0-24.5)           |         |
| Location of tumor           |                           |         |
| Proximal colon              | 10.0 (4.0-19.0)           | 0.656   |
| Distal colon                | 11.0 (5.0-28.0)           |         |
| Rectum                      | 9.0 (5.0-25.0)            |         |
| Preoperative RT/CRT         |                           |         |
| No                          | 9.5 (5.0-19.8)            | 0.188   |
| Yes                         | 11.0 (6.0-35.0)           |         |
| WHO grade                   |                           |         |
| G1 (well)                   | 6.0 (3.5-20.8)            | 0.712   |
| G2 (moderately)             | 10.0 (5.0-25.0)           |         |
| G3 (poorly)                 | 8.0 (3.0-40.0)            |         |
| TNM Stage                   |                           |         |
| Stage I                     | 5.0 (2.8-8.5)             | 8.5E-4  |
| Stage II                    | 10.0 (5.0-24.0)           |         |
| Stage III                   | 10.5 (5.0-25.6)           |         |
| Stage IV                    | 25.0 (10.0-45.0)          |         |
| Primary tumor               |                           |         |
| pT1                         | 8.0 (5.0-11.5)            | 4.0E-6  |
| pT2                         | 5.0 (2.0-6.8)             |         |
| pT3                         | 11.0 (5.0-25.0)           |         |
| pT4                         | 50.0 (15.0-70.0)          |         |
| Lymph nodes                 |                           |         |
| pN0 (0 nodes)               | 7.0 (4.5-16.5)            | 4.0E-3  |
| pN1 (1-3 nodes)             | 8.5 (5.0-19.5)            |         |
| pN2 (≥4 nodes)              | 25.0 (9.5-42.5)           |         |
| Distant Metastasis          |                           |         |
| No                          | 8.0 (5.0-20.5)            | 5.0E-3  |
| Yes                         | 25.0 (10.0-45.0)          |         |
| Lymphatic invasion          |                           |         |
| No                          | 7.0 (4.0-18.0)            | 1.2E-3  |
| Yes                         | 14.0 (6.50-35.0)          |         |
| Blood vessel invasion       |                           |         |
| No                          | 7.0 (5.0-16.5)            | 1.3E-4  |
| Yes                         | 22.0 (13.0-50.0)          |         |
| Infiltrative growth pattern |                           |         |
| No                          | 10.0 (5.0-24.5)           | 0.263   |

|                               |                 |       |
|-------------------------------|-----------------|-------|
| Yes                           | 11.5 (5.0-27.5) |       |
| Serrated histology            |                 |       |
| No                            | 11.0 (5.0-25.0) | 0.014 |
| Yes                           | 5.0 (2.5-15.0)  |       |
| KRAS and BRAF mutation status |                 |       |
| KRAS                          | 7.5 (3.8-14.3)  | 0.384 |
| BRAF V600E                    | 7.0 (2.8-28.8)  |       |
| wt KRAS and BRAF V600E        | 10.0 (5.0-28.0) |       |
| MMR screening status          |                 |       |
| MMR deficient                 | 7.0 (2.0-30.0)  | 0.447 |
| MMR proficient                | 10.0 (5.0-24.8) |       |

---

Abbreviations: MMR: mismatch repair. P values are for Mann-Whitney *U* test or Kruskal-Wallis test.

**Table S4.** Correlations between preoperative radiotherapy (RT) or chemoradioterapy (CRT) and microvascular density (MVD) and proliferation rate.

| Variable                       | Preoperative RT/CRT |                  | p value |
|--------------------------------|---------------------|------------------|---------|
|                                | No (n=116)          | Yes (n=31)       |         |
| CD31 MVD (1/mm <sup>2</sup> )  | 44.8 (30.6-62.5)    | 37.1 (23.0-56.4) | 0.085   |
| vWF MVD (1/mm <sup>2</sup> )   | 22.7 (16.3-31.9)    | 22.0 (10.5-31.6) | 0.231   |
| CD105 MVD (1/mm <sup>2</sup> ) | 8.44 (4.53-15.0)    | 14.9 (7.15-21.6) | 0.021   |
| Proliferation rate, Ki-67 (%)  | 26.9 (12.3-52.0)    | 31.4 (2.8-62.1)  | 0.952   |

**Table S5.** Survival analysis follow-up and endpoint data

|                                                    | DFS                      | CSS                     | OS                      |
|----------------------------------------------------|--------------------------|-------------------------|-------------------------|
| <b>Study cohort (n=147)</b>                        |                          |                         |                         |
| Included patients                                  | 124 (84.5%)              | 147 (100.0%)            | 147 (100.0%)            |
| Excluded patients                                  | 23 (15.6%) <sup>A</sup>  | 0 (0.0%)                | 0 (0.0%)                |
| Events                                             | 25 (20.2%)               | 32 (21.8%)              | 44 (29.9%)              |
| Follow-up, median (IQR)                            | 51.0 (19.2-60.0)         | 59.2 (36.0-60.0)        | 59.2 (36.0-60.0)        |
| Follow-up in patients with events, median (IQR)    | 12.0 (7.1-20.1)          | 22.4 (15.4-31.5)        | 21.4 (13.1-31.8)        |
| Follow-up in patients without events, median (IQR) | 60.0 (26.4-60.0)         | 60.0 (52.1-60.0)        | 60.0 (57.8-60.0)        |
| <b>Validation cohort (n=418)</b>                   |                          |                         |                         |
| Included patients                                  | 303 (72.5%)              | 352 (84.2%)             | 352 (84.2%)             |
| Excluded patients                                  | 105 (25.1%) <sup>B</sup> | 66 (15.8%) <sup>C</sup> | 66 (15.8%) <sup>C</sup> |
| Events                                             | 92 (30.4%)               | 129 (36.7%)             | 175 (49.7%)             |
| Follow-up, median (IQR)                            | 25.0 (12.0-60.0)         | 31.0 (14.0-60.0)        | 31.0 (14.0-60.0)        |
| Follow-up in patients with events, median (IQR)    | 12.0 (8.0-19.0)          | 20.0 (8.0-36.5)         | 16.0 (6.0-35.0)         |
| Follow-up in patients without events, median (IQR) | 41.0 (17.0-60.0)         | 60.0 (27.0-60.0)        | 60.0 (27.0-60.0)        |

<sup>A</sup>Palliative operation in 23/23 (100%) of the excluded cases.

<sup>B</sup>No follow-up data for 66/105 (62.9%) of the excluded patients. Palliative operation in 39/105 (37.1%) of the excluded cases.

<sup>C</sup>No follow-up data for 66/66 (100%) of the excluded patients.

**Table S6.** Receiver operating characteristics (ROC) analysis for determining cut-off points in detecting disease-free survival

|                | AUC   | 95%CI       | Cut-off point      |
|----------------|-------|-------------|--------------------|
| Tumor necrosis | 0.628 | 0.513-0.743 | 10%                |
| CD31 MVD       | 0.532 | 0.414-0.651 | 45/mm <sup>2</sup> |
| vWF MVD        | 0.591 | 0.478-0.704 | 20/mm <sup>2</sup> |
| CD105 MVD      | 0.604 | 0.476-0.732 | 10/mm <sup>2</sup> |
| Ki-67          | 0.562 | 0.436-0.689 | 30%                |

**Table S7.** Univariate analysis of disease-free survival (DFS), cancer-specific survival (CSS), and overall survival (OS) according to tumor necrosis, microvascular density, proliferation rate, serrated growth pattern and infiltrative tumor border in the study cohort.

|                                                          | DFS  |           |         | CSS  |           |         | OS   |           |         |
|----------------------------------------------------------|------|-----------|---------|------|-----------|---------|------|-----------|---------|
|                                                          | HR   | 95% CI    | p value | HR   | 95% CI    | p value | HR   | 95% CI    | p value |
| Tumor necrosis (<10% vs. ≥10%)                           | 2.34 | 1.03-5.30 | 0.041   | 2.74 | 1.27-5.93 | 0.010   | 2.08 | 1.11-3.88 | 0.022   |
| CD31 MVD (<45/mm <sup>2</sup> vs. ≥45/mm <sup>2</sup> )  | 1.02 | 0.46-2.23 | 0.966   | 0.56 | 0.27-1.17 | 0.124   | 1.79 | 0.96-3.33 | 0.068   |
| vWF MVD (<20/mm <sup>2</sup> vs. ≥20/mm <sup>2</sup> )   | 1.08 | 0.48-2.45 | 0.850   | 0.50 | 0.25-1.00 | 0.050   | 1.87 | 1.03-3.39 | 0.039   |
| CD105 MVD (<10/mm <sup>2</sup> vs. ≥10/mm <sup>2</sup> ) | 2.26 | 1.00-5.11 | 0.051   | 0.86 | 0.43-1.74 | 0.676   | 1.04 | 0.57-1.89 | 0.892   |
| Ki-67 (≤30% vs. >30%)                                    | 0.56 | 0.25-1.26 | 0.162   | 0.71 | 0.35-1.45 | 0.349   | 1.12 | 0.62-2.03 | 0.716   |
| Serrated growth pattern (No vs. Yes)                     | 1.34 | 0.56-3.21 | 0.512   | 1.12 | 0.51-2.50 | 0.775   | 0.79 | 0.41-1.53 | 0.484   |
| Infiltrative tumor border (No vs. Yes)                   | 3.89 | 1.77-8.53 | 7.0E-4  | 2.71 | 1.35-5.44 | 4.9E-3  | 0.47 | 0.26-0.86 | 0.014   |

Abbreviations: MVD: microvascular density.



**Table S8.** Correlations between tumor necrosis and clinicopathological characteristics in the validation cohort (n=418)

| Variable                     | Necrosis percentage |         |
|------------------------------|---------------------|---------|
|                              | Median (IQR)        | P value |
| Age                          |                     |         |
| <65                          | 7.0 (5.0-15.0)      | 0.921   |
| ≥65                          | 8.0 (5.0-15.0)      |         |
| Sex                          |                     |         |
| Male                         | 8.0 (5.0-16.0)      | 0.807   |
| Female                       | 8.0 (5.0-15.0)      |         |
| Location of tumor            |                     |         |
| Proximal colon               | 8.0 (4.9-15.5)      | 0.872   |
| Distal colon                 | 7.0 (4.0-17.5)      |         |
| Rectum                       | 8.0 (4.5-15.0)      |         |
| WHO grade                    |                     |         |
| G1 (well)                    | 5.0 (3.0-9.5)       | 2.6E-8  |
| G2 (moderately)              | 9.0 (5.0-17.3)      |         |
| G3 (poorly)                  | 10.0 (5.0-20.0)     |         |
| TNM Stage                    |                     |         |
| Stage I                      | 5.0 (3.0-7.0)       | 1.5E-10 |
| Stage II                     | 9.0 (5.0-17.5)      |         |
| Stage III                    | 10.0 (5.0-20.0)     |         |
| Stage IV                     | 11.0 (5.0-21.25)    |         |
| Primary tumor                |                     |         |
| pT1                          | 3.0 (2.3-5.0)       | 1.3E-10 |
| pT2                          | 5.0 (3.0-8.0)       |         |
| pT3                          | 10.0 (5.0-20.0)     |         |
| pT4                          | 8.0 (5.0-22.5)      |         |
| Lymph nodes                  |                     |         |
| pN0 (0 nodes)                | 7.0 (4.0-15.0)      | 1.2E-3  |
| pN1 (1-3 nodes)              | 10.0 (5.0-16.0)     |         |
| pN2 (≥4 nodes)               | 13.0 (5.0-20.0)     |         |
| Distant Metastasis           |                     |         |
| No                           | 8.0 (5.0-15.0)      | 0.029   |
| Yes                          | 11.0 (5.0-21.25)    |         |
| Lymphatic invasion           |                     |         |
| No                           | 7.0 (4.0-15.0)      | 0.065   |
| Yes                          | 9.0 (5.0-16.0)      |         |
| Blood vessel invasion        |                     |         |
| No                           | 7.0 (5.0-15.0)      | 0.012   |
| Yes                          | 12.0 (5.0-20.0)     |         |
| Infiltrative growth pattern  |                     |         |
| No                           | 8.0 (5.0-15.5)      | 0.869   |
| Yes                          | 7.0 (5.0-15.0)      |         |
| Serrated type growth pattern |                     |         |
| No                           | 8.0 (5.0-17.0)      | 3.1E-6  |

|                      |                |       |
|----------------------|----------------|-------|
| Yes                  | 5.0 (2.0-8.5)  |       |
| MMR screening status |                |       |
| MMR deficient        | 7.0 (3.0-16.5) | 0.208 |
| MMR proficient       | 8.0 (5.0-15.0) |       |

---

Abbreviations: MMR: mismatch repair. P values are for Mann-Whitney *U* test or Kruskal-Wallis test.

**Table S9.** Cox regression model for the independent prognostic significance of tumor necrosis in the subgroup of TNM stage II patients in the validation cohort.

|                                                 | DFS  |           |         | CSS  |           |         | OS   |           |         |
|-------------------------------------------------|------|-----------|---------|------|-----------|---------|------|-----------|---------|
|                                                 | HR   | 95% CI    | p value | HR   | 95% CI    | p value | HR   | 95% CI    | p value |
| WHO Grade (1-2 vs. 3)                           | 1.69 | 0.73-3.93 | 0.216   | 1.64 | 0.66-4.06 | 0.285   | 1.93 | 0.97-3.83 | 0.060   |
| Tumor location (Colon vs. Rectum)               | 1.75 | 0.92-3.32 | 0.087   | 1.76 | 0.89-3.50 | 0.105   | 1.49 | 0.86-2.59 | 0.154   |
| Lymphatic or blood vessel invasion (No vs. Yes) | 1.61 | 0.77-3.33 | 0.203   | 1.93 | 0.89-4.19 | 0.097   | 2.33 | 1.25-4.32 | 7.5E-3  |
| Infiltrative tumor border (No vs. Yes)          | 4.70 | 2.19-10.1 | 7.3E-5  | 3.78 | 1.71-8.35 | 1.0E-3  | 2.51 | 1.30-4.87 | 6.4E-3  |
| Tumor necrosis (<10% vs. ≥10%)                  | 1.96 | 1.02-3.76 | 0.043   | 2.18 | 1.09-4.34 | 0.027   | 1.75 | 1.01-3.02 | 0.046   |

**Supplementary figures**

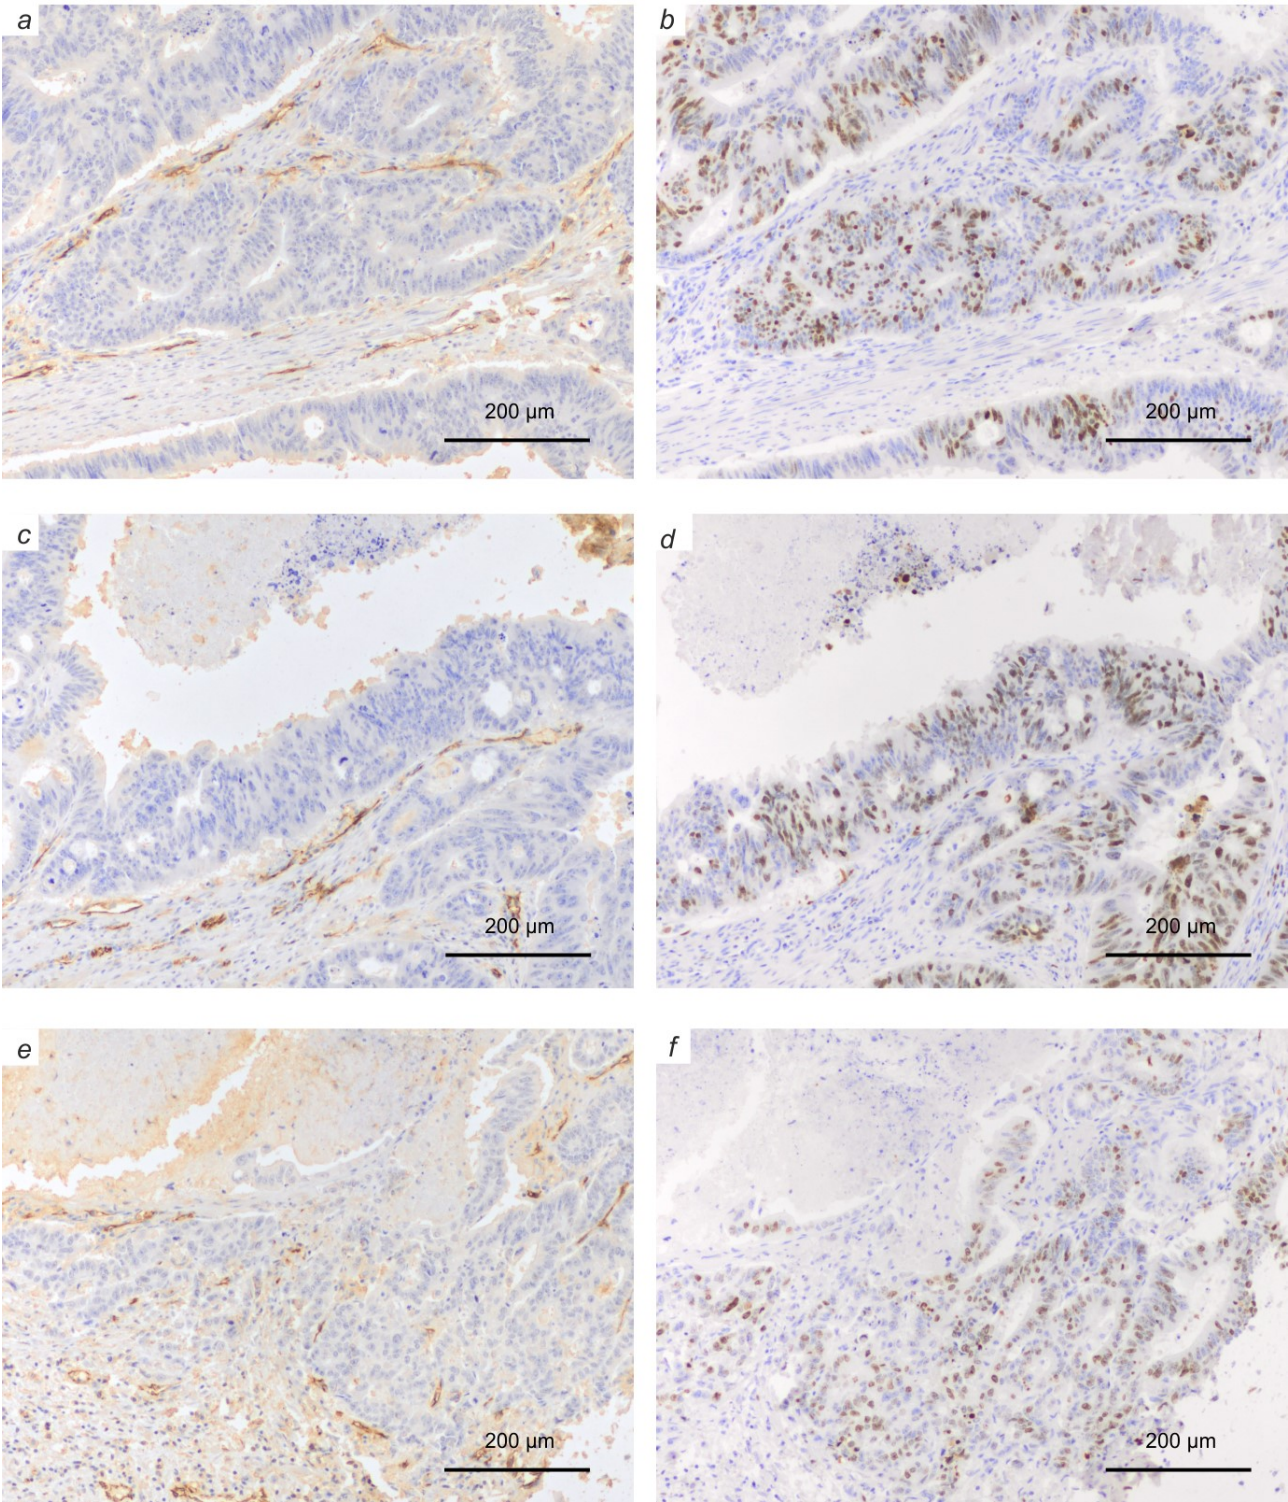

**Fig S1.** Example of CD31 MVD (a, c, e) and Ki-67 index (b, d, f) in different tumor areas and adjacent and distant to necrosis in one colorectal cancer case. Center of the tumor, no necrosis (a, b). Center of the tumor,

necrosis (c, d). Invasive front, necrosis (e, f). CD31 MVD in different tumor locations, as well as the proliferation rate in different tumor locations, had high correlation.
